# Supplementary material for: Regulation of NF-κB inhibitor IκBα and viral replication by a KSHV microRNA
Source: Springer Nature journal article supplement (doi:10.1038/ncb2019), 2010-01-17
Supplement: 41556_2010_BFncb2019_MOESM16_ESM.pdf [file 41556_2010_BFncb2019_MOESM16_ESM.pdf]

DOI: 10.1038/ncb2019

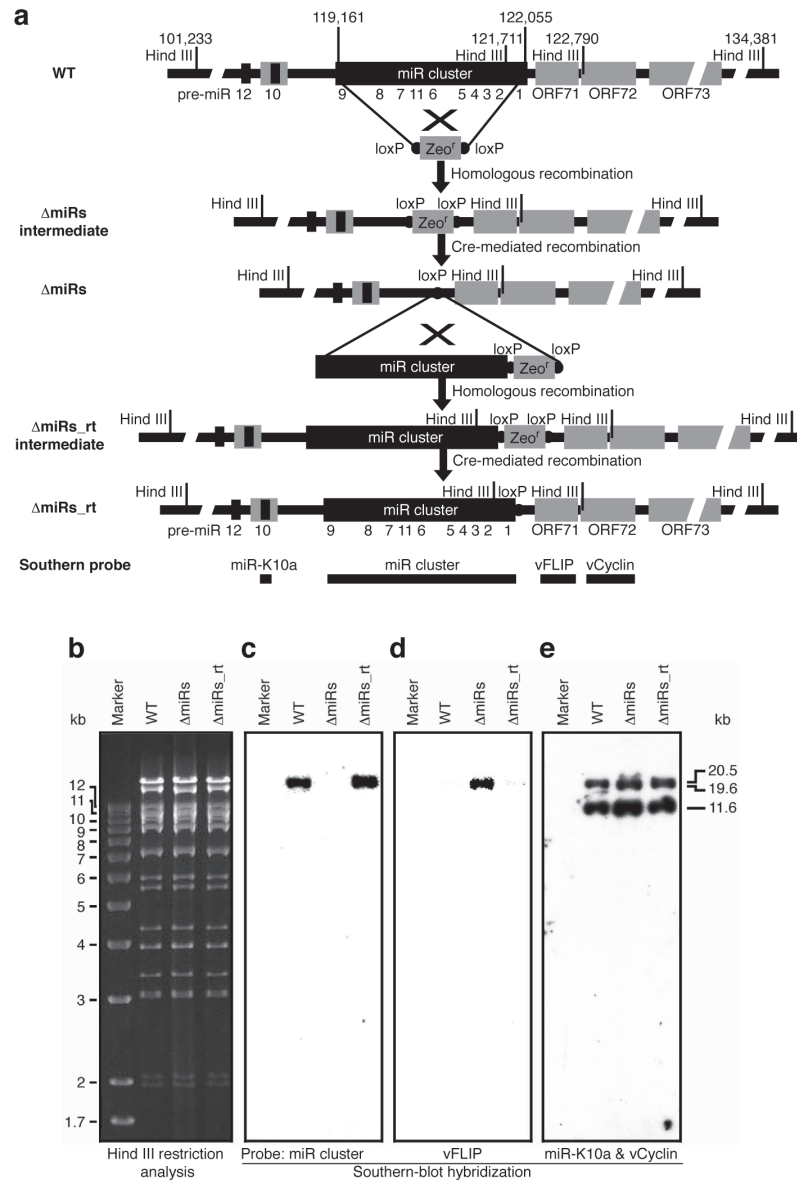

**Figure S1** Generation of a KSHV mutant with a cluster of 14 miRs deleted ( $\Delta$ miRs) and its revertant ( $\Delta$ miRs<sub>rt</sub>) using wild-type virus BAC36 (WT). (a) Strategy for generating KSHV mutant  $\Delta$ miRs and revertant  $\Delta$ miRs<sub>rt</sub>. Details are described in the Methods. (b–e) Genetic analysis of WT,  $\Delta$ miRs and  $\Delta$ miRs<sub>rt</sub> recombinant viruses demonstrating the deletion of the miR cluster in the  $\Delta$ miRs genome, which is repaired in the  $\Delta$ miRs<sub>rt</sub> genome without affecting other parts of KSHV genome. Hind III restriction analysis of WT,  $\Delta$ miRs and  $\Delta$ miRs<sub>rt</sub> genomes (b) and Southern-blot hybridization with probe of the miR cluster (c), vFLIP (d), or combination of miR-K10a and vCyclin (e). HindIII digestion showed that WT,  $\Delta$ miRs and  $\Delta$ miRs<sub>rt</sub> recombinant viruses had similar restriction patterns (b). WT had three bands in the latent locus including a 20.5 kb band containing all the 17 miRs

except miR-K1, a 1.1 kb band containing vFLIP beyond the resolution of the gel, and a 11.6 kb band containing vCyclin and LANA. Deletion of the miR cluster eliminated one HindIII site at position 121,711 generating a new 19.6 kb band derived from the merge of the remaining portions of the 20.5 and 1.1 kb bands. The revertant was identical to WT except the insertion of a LoxP site immediately outside the miR cluster. Southern-hybridization with the miR cluster as a probe detected the 20.5 kb band in the WT and  $\Delta$ miRs<sub>rt</sub> lanes but not in the  $\Delta$ miRs lane (c). The vFLIP probe only detected the 19.6 kb band in the  $\Delta$ miRs lane but not in the WT and  $\Delta$ miRs<sub>rt</sub> lanes (d). The vCyclin probe detected the 11.6 kb band in all the recombinant viruses while the miR-K10a probe detected the 20.5 kb band in the WT and  $\Delta$ miRs<sub>rt</sub> lanes but the 19.6 kb band in the  $\Delta$ miRs lane (e).

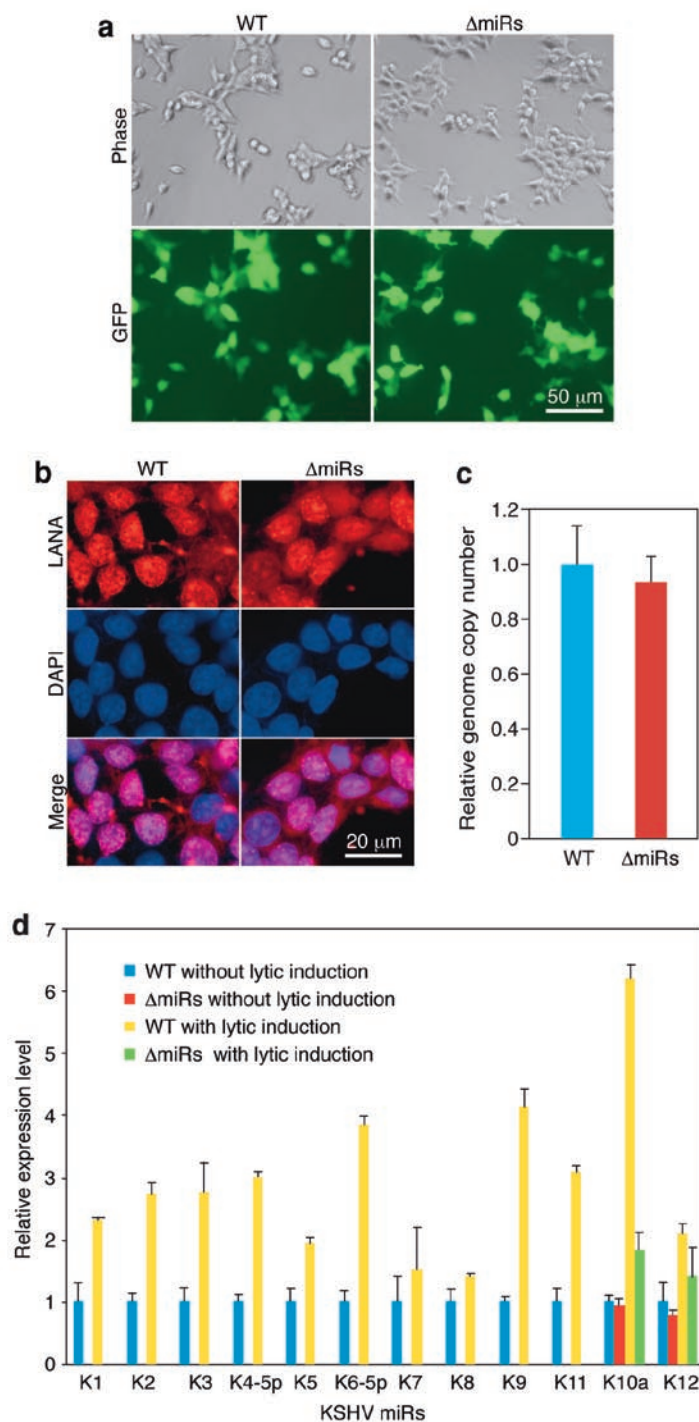

**Figure S2** Reconstitution of KSHV recombinant viruses in 293T cells. **(a)** Morphology of WT and  $\Delta$ miRs in 293T cells. **(b)** Immunofluorescence staining of LANA with a specific monoclonal antibody showing that all WT and  $\Delta$ miRs cells were LANA-positive with similar nuclear staining pattern. **(c)** Relative KSHV genome copy number in WT and  $\Delta$ miRs 293T cells determined by quantitative real-time PCR. **(d)** Detection of individual KSHV

miRs in WT and  $\Delta$ miRs 293T cells. The presence and expression levels of individual KSHV miRs was examined in uninduced WT and  $\Delta$ miRs cells, and cells induced with TPA and sodium butyrate for 48 h by quantitative real-time reverse transcription PCR. Data are means  $\pm$  SEM from three ( $n = 3$ ) independent experiments (**c**, **d**). For image panels, representative images from three (**a**, **b**) independent experiments are presented.

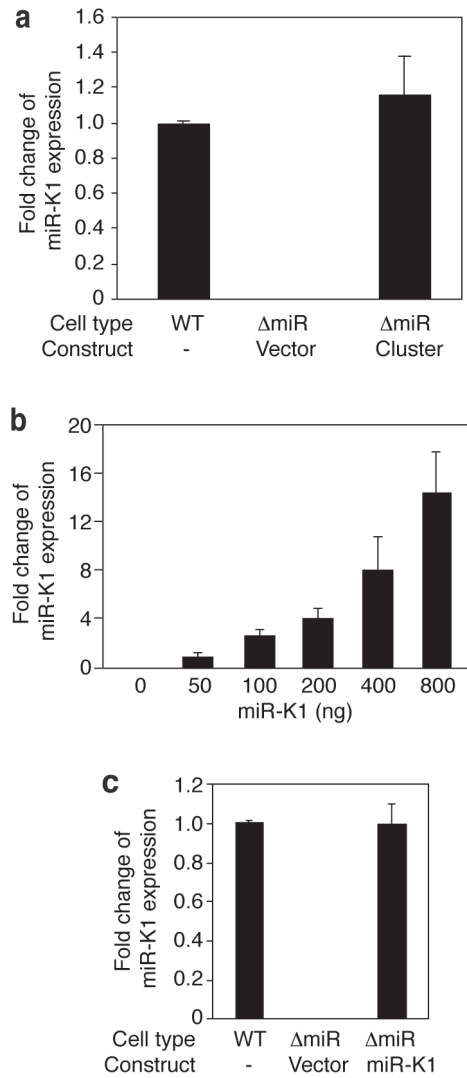

**Figure S3** miR-K1 expression detected by quantitative real-time reverse transcription PCR. **(a)** Stable expression of the miR cluster in  $\Delta$ miRs cells resulted in the expression of miR-K1 at a level similar to that of WT cells. **(b)** The expression level of miR-K1 increased at a dose-dependent fashion

with increasing input of miR-K1 construct DNA in transient transfection in 293T cells. **(c)** Stable expression of miR-K1 in  $\Delta$ miRs cells resulted in the expression of miR-K1 at a level similar to that of WT cells. Data are means  $\pm$  SEM from three ( $n = 3$ ) independent experiments.

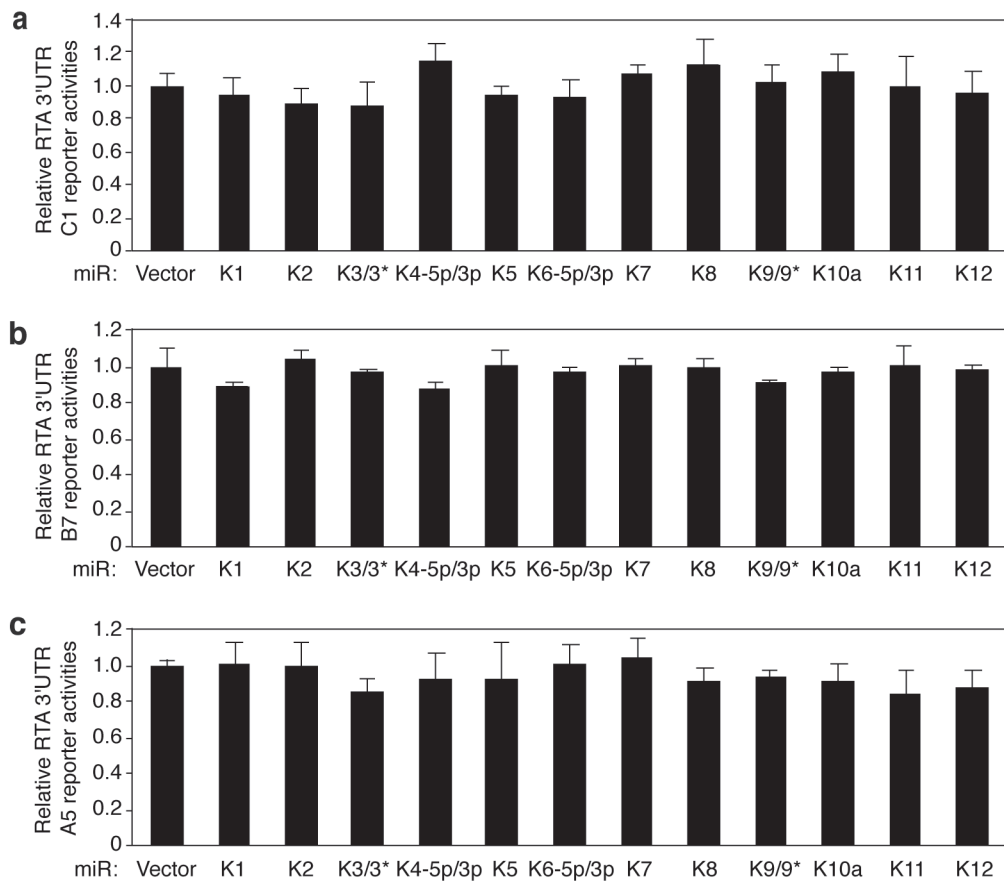

**Figure S4** Effects of KSHV miRs on the 3'UTRs of RTA and ZTA transcripts measured in reporter assays in 293T cells. **(a-c)** Cells cotransfected with 3'UTR reporter constructs of RTA and ZTA type I transcript **(a)**, type II transcript **(b)** and type III transcript **(c)**, together with a  $\beta$ -galactosidase

expression vector pSV- $\beta$ -gal and a vector control or a expression vector of individual KSHV miRs were collected at 36 h post-transfection, and examined for luciferase activities, which were normalized to  $\beta$ -galactosidase activity. Data are means  $\pm$  SEM from three ( $n = 3$ ) independent experiments.

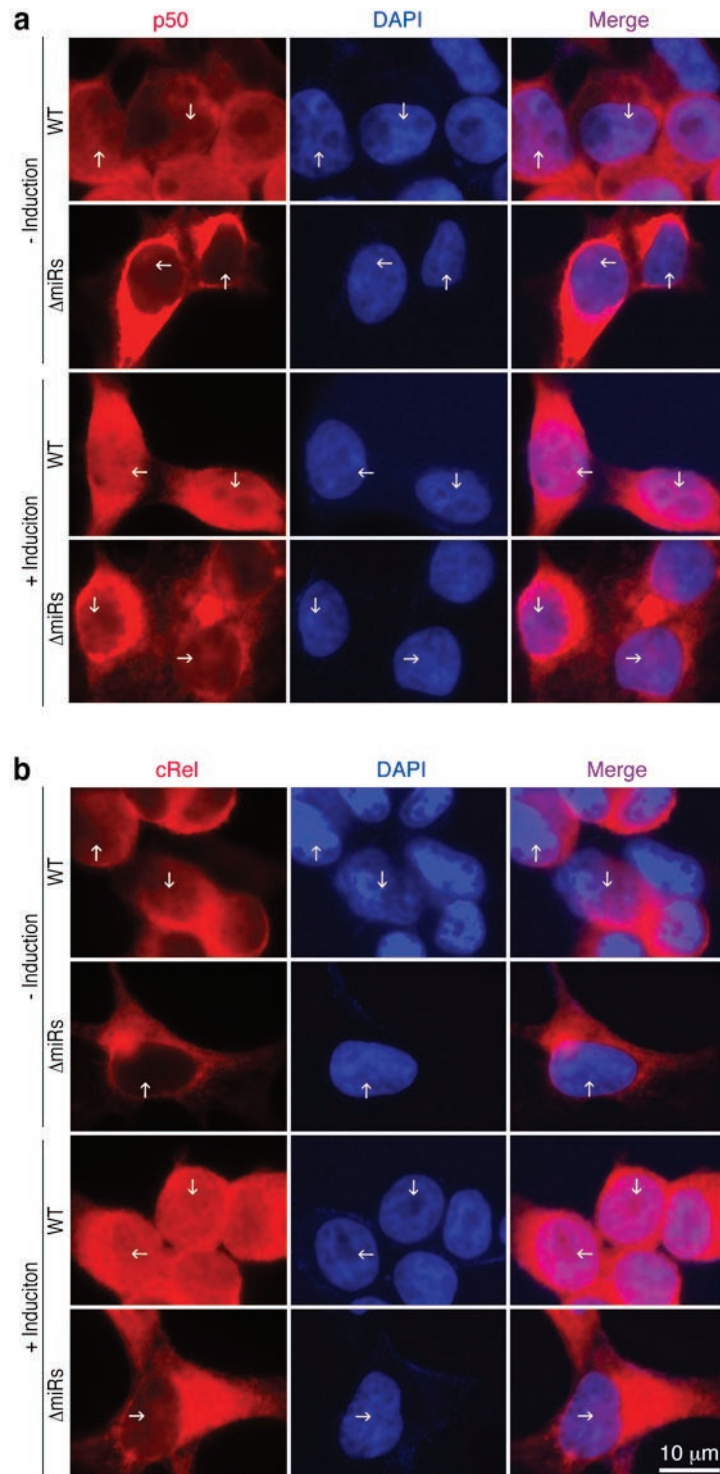

**Figure S5** Immunofluorescence staining of NF- $\kappa$ B complex proteins p50 and cRel in WT and  $\Delta$ miRs 293T cells. **(a)** p50 staining in uninduced WT and  $\Delta$ miRs cells, and cells induced with TPA and sodium butyrate (T/B) for 24

**(b)** cRel staining in uninduced WT and  $\Delta$ miRs cells, and cells induced with T/B for 24 h. WT cells had stronger staining of p50 and cRel proteins in nuclei identified by DAPI than  $\Delta$ miRs cells had (white arrow).

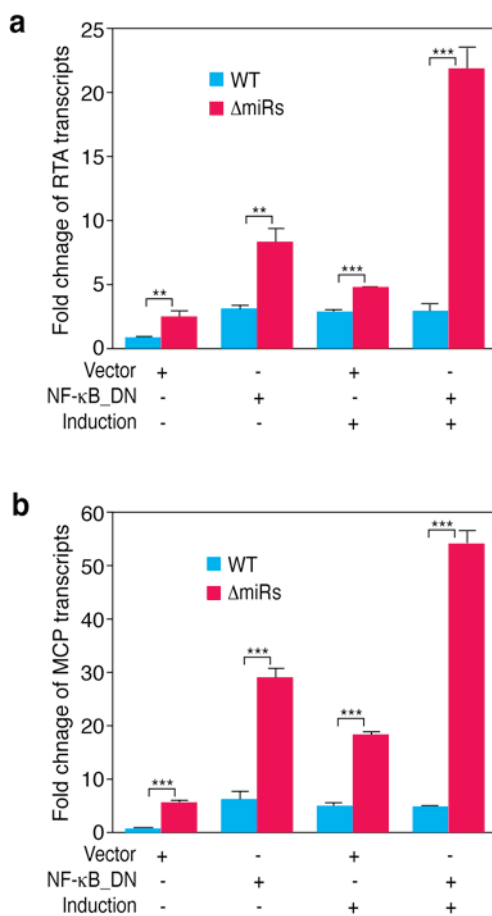

**Figure S6** NF-κB pathway mediates the expression of KSHV lytic genes in 293T cells. **(a-b)** Levels of RTA **(a)** and MCP **(b)** transcripts examined by quantitative real-time reverse transcription PCR in WT and ΔmiRs cells transfected with

the NF-κB dominant negative (DN) plasmid pκB-αM or control vector for 72 h. Induced cells were treated with TPA and sodium butyrate for 48 h before collection. Data are means ± SEM from three (n = 3) independent experiments.

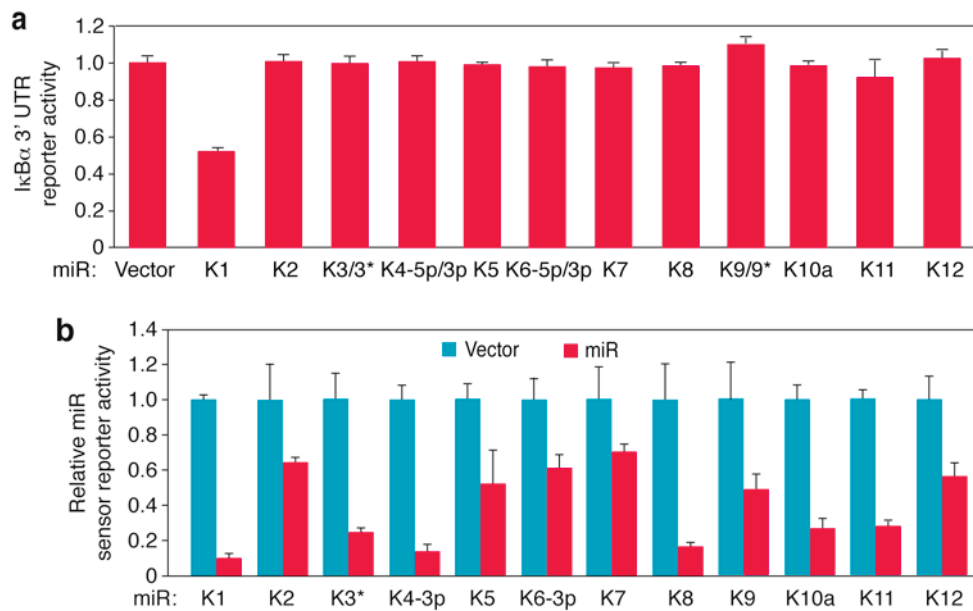

**Figure S7** Identification of KSHV miR-K1 that suppresses IκBα 3'UTR reporter activity in 293T cells. **(a)** Relative IκBα 3'UTR reporter activities following cotransfection with individual miRs. Cells cotransfected with the IκBα 3'UTR reporter construct (IκBα-WT) together with a vector control or an expression vector of individual miRs were collected at 36 h post-transfection, and examined for luciferase activities. **(b)** Relative reporter activities of miR sensor reporters containing perfect matching sequences of

their respective miRs following cotransfection with individual miRs. Cells cotransfected with the miR sensor reporters together with either a vector control or an expression vector of their respective miR were collected at 36 h post-transfection, and examined for luciferase activities. The expression constructs of KSHV miRs were functional as shown by their suppressive effects on the reporter activities of their respective sensor reporters. Data are means ± SEM from three (n = 3) independent experiments.

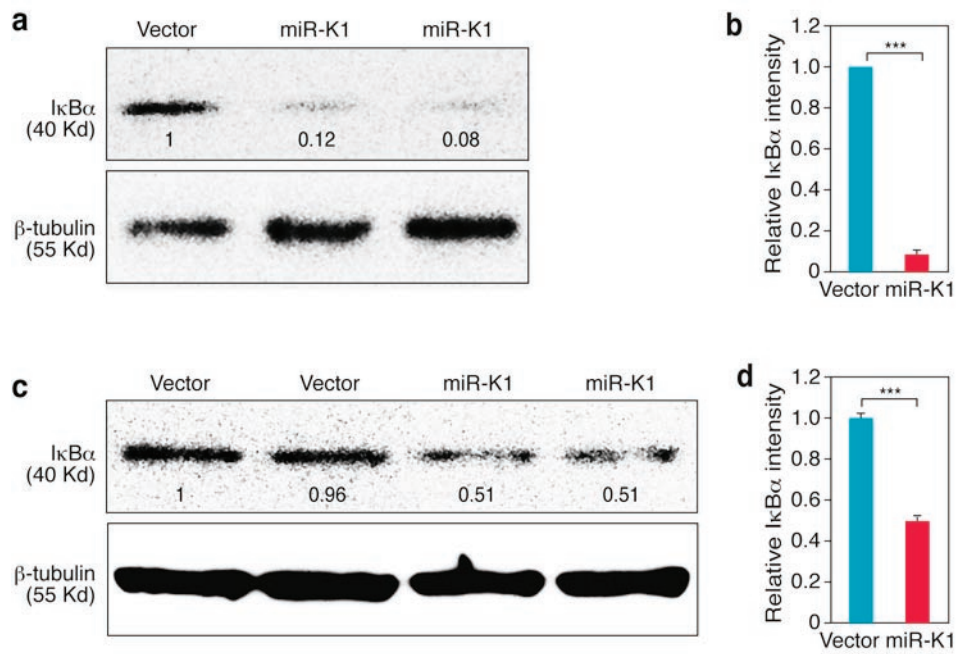

**Figure S8** miR-K1 suppresses the expression of IκBα protein. Expression of miR-K1 suppressed IκBα protein in KSHV-negative (**a**, **b**) or ΔmiRs 293T cells (**c**, **d**). Cells transfected with a vector control or a miR-K1 expression

vector were collected at 96 h post-transfection, and analyzed for IκBα protein by Western-blotting (**a**, **c**). Results are means of three images from three independent experiments (**b**, **d**).



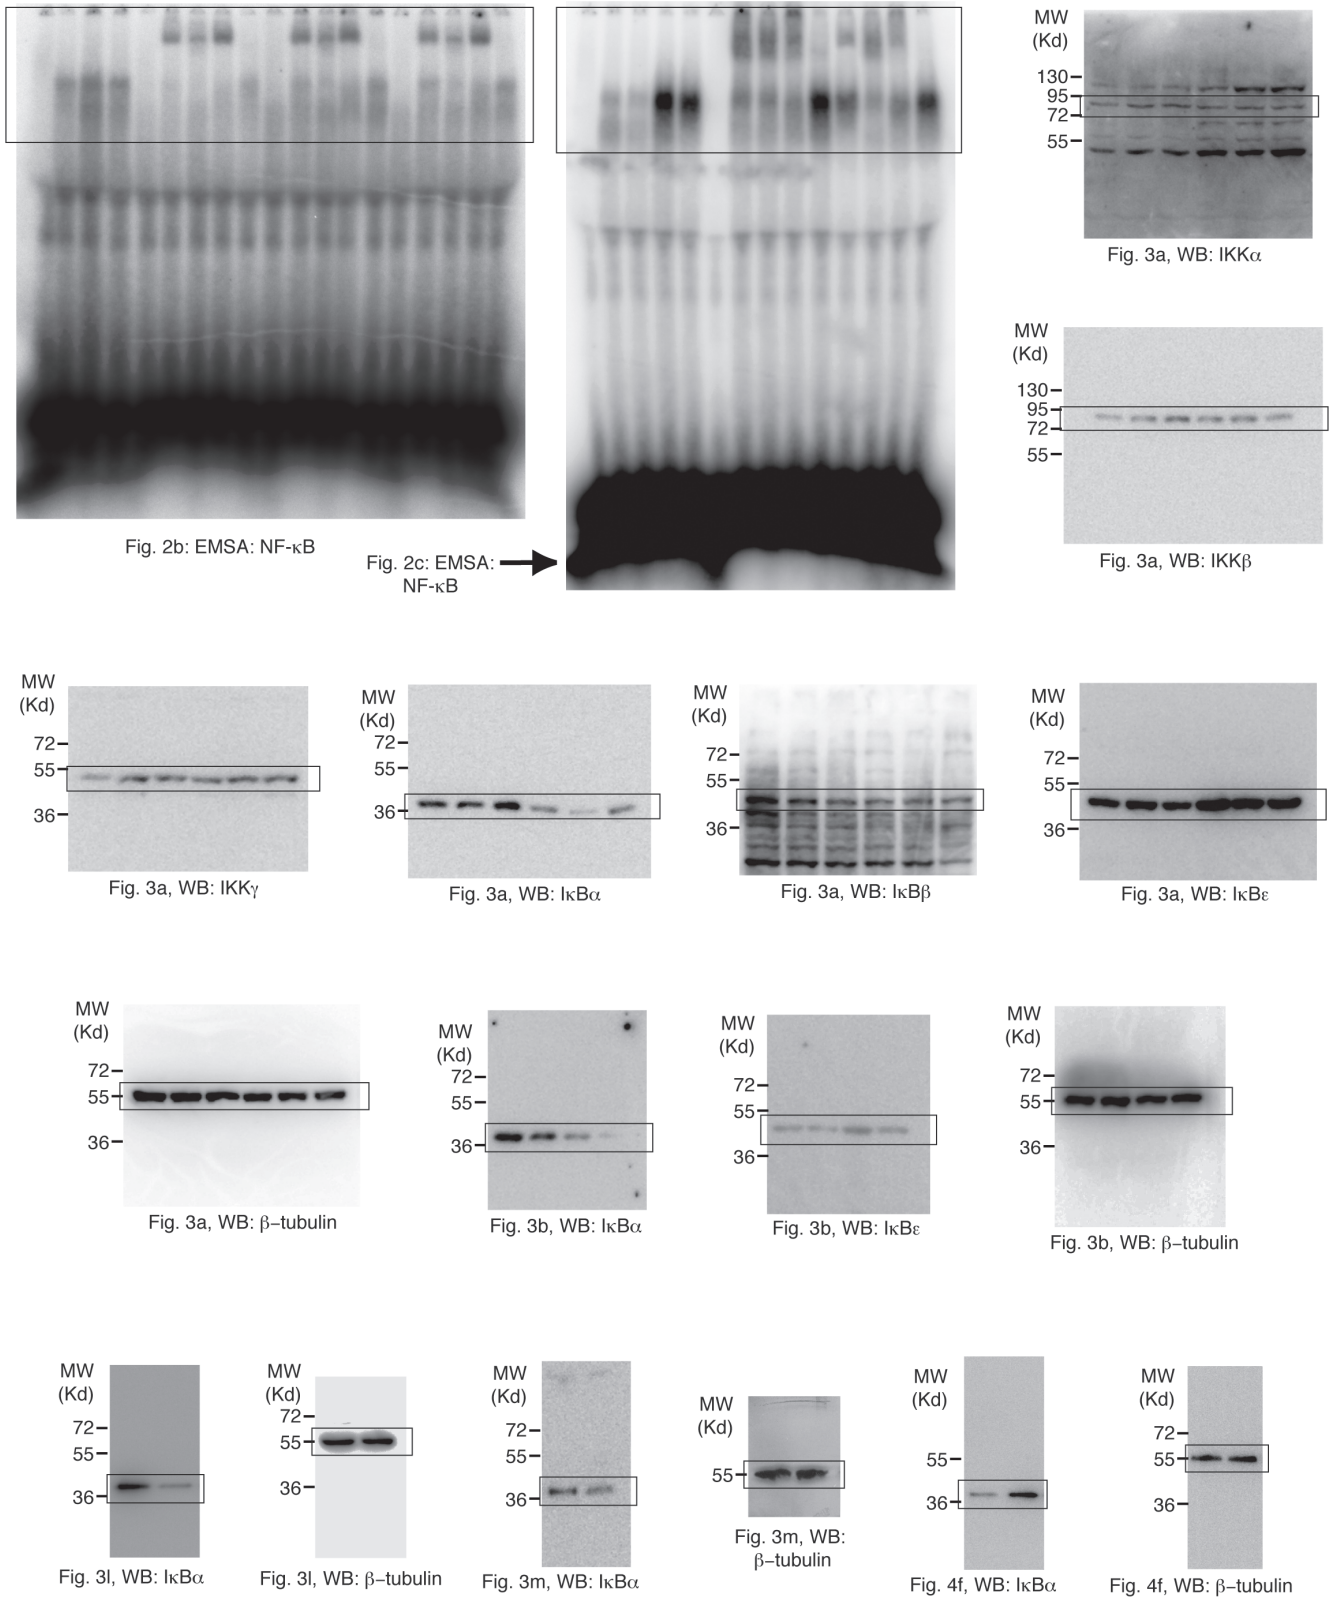

Figure S9 Full scans of key image data.

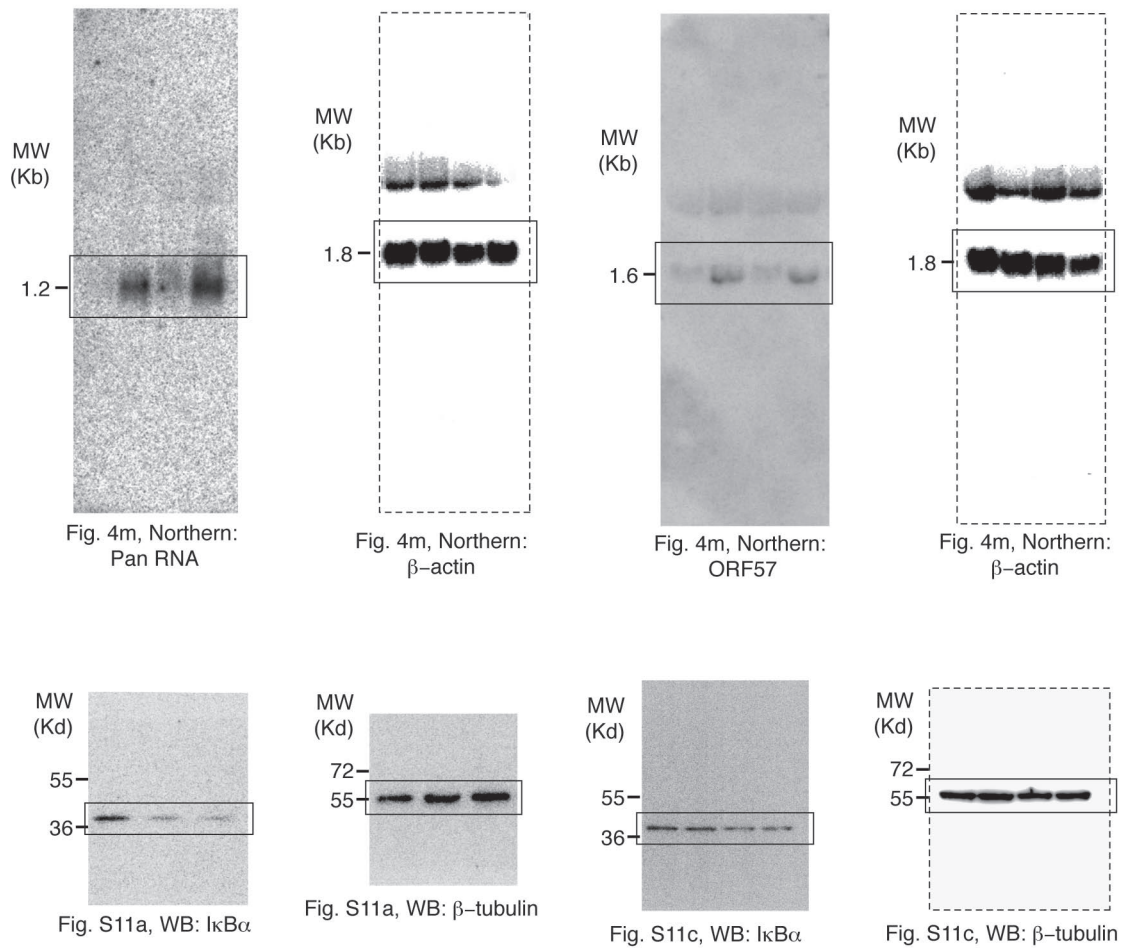

Figure S9 continued

**Supplementary Table 1: Primers for reverse-transcription (RT) and PCR detection of KSHV genes and miRs**

| Target            | Application | Primer                                                                             |
|-------------------|-------------|------------------------------------------------------------------------------------|
| MCP               | PCR         | ORF25F: 5'-CTCGGCGACGTGCTATAACAAT-3'<br>ORF25R: 5'-TGCCGACAAGGACTGTACATG-3'        |
| RTA               | PCR         | ORF50F: 5'-CACAAAAATGGCGCAAGATGA-3'<br>ORF50R: 5'-TGGTAGAGTTGGGCCTTCAGTT-3'        |
| vFLIP             | PCR         | ORF71F: 5'-GGATGCCCTAATGTCAATGC-3'<br>ORF71R: 5'-GGCGATAGTGTGGGAGTGT-3'            |
| vCyclin           | PCR         | ORF72F: 5'-GCTGATAATAGAGGCGGGCAATGAG-3'<br>ORF72R: 5'-GTTGGCGTGGCGAACAGAGGCAGTC-3' |
| LANA              | PCR         | ORF73F: 5'-GCAGACACTGAAACGCTGAA-3'<br>ORF73R: 5'-AGGTGAGCCACCAGGACTTA-3'           |
| GAPDH             | PCR         | GAPDH-F: 5'-CCCCTGGCCAAGGTCATCCA-3'<br>GAPDH-R: 5'-ACAGCCTTGGCAGCGCCAGT-3'         |
| Kshv-miR-K12-1    | RT          | Kshv-miR-K12-1 RT: 5'-GTCGTATCCAGTGCAGGGTCCGAGGTATTC<br>GCACTGGATACGACGCTTAC-3'    |
| Kshv-miR-K12-2    | RT          | Kshv-miR-K12-2 RT: 5'-GTCGTATCCAGTGCAGGGTCCGAGGTATTC<br>GCACTGGATACGACCAGATC-3'    |
| Kshv-miR-K12-3    | RT          | Kshv-miR-K12-3 RT: 5'-GTCGTATCCAGTGCAGGGTCCGAGGTATTC<br>GCACTGGATACGACCGCTGC-3'    |
| Kshv-miR-K12-4-5p | RT          | Kshv-miR-K12-4 RT: 5'-GTCGTATCCAGTGCAGGGTCCGAGGTATTC<br>GCACTGGATACGACCCTAGA-3'    |
| Kshv-miR-K12-5    | RT          | Kshv-miR-K12-5 RT: 5'-GTCGTATCCAGTGCAGGGTCCGAGGTATTC<br>GCACTGGATACGACCCGGCA-3'    |
| Kshv-miR-K12-6-5p | RT          | Kshv-miR-K12-6 RT: 5'-GTCGTATCCAGTGCAGGGTCCGAGGTATTC<br>GCACTGGATACGACCCGATG-3'    |
| Kshv-miR-K12-7    | RT          | Kshv-miR-K12-7 RT: 5'-GTCGTATCCAGTGCAGGGTCCGAGGTATTC<br>GCACTGGATACGACAGCGCC-3'    |
| Kshv-miR-K12-8    | RT          | Kshv-miR-K12-8 RT: 5'-GTCGTATCCAGTGCAGGGTCCGAGGTATTC<br>GCACTGGATACGACCGTGCT-3'    |
| Kshv-miR-K12-9    | RT          | Kshv-miR-K12-9 RT: 5'-GTCGTATCCAGTGCAGGGTCCGAGGTATTC<br>GCACTGGATACGACAGCGGG-3'    |
| Kshv-miR-K12-10a  | RT          | Kshv-miR-K12-10 RT: 5'-GTCGTATCCAGTGCAGGGTCCGAGGTATT<br>CGCACTGGATACGACGCCACT-3'   |
| Kshv-miR-K12-11   | RT          | Kshv-miR-K12-11 RT: 5'-GTCGTATCCAGTGCAGGGTCCGAGGTATT<br>CGCACTGGATACGACTCGGAC-3'   |
| Kshv-miR-K12-12   | RT          | Kshv-miR-K12-12 RT: 5'-GTCGTATCCAGTGCAGGGTCCGAGGTATT<br>CGCACTGGATACGACCCGAGA-3'   |

---

|                   |     |                                                |
|-------------------|-----|------------------------------------------------|
| Kshv-miR-K12-1    | PCR | Kshv-miR-K12-1 F: 5'-CGCGCATTACAGGAAACTGGG-3'  |
| Kshv-miR-K12-2    | PCR | Kshv-miR-K12-2 F: 5'-CGTGCAACTGTAGTCCGGGTC-3'  |
| Kshv-miR-K12-3    | PCR | Kshv-miR-K12-3 F: 5'-CGCGCTCACATTCTGAGGACG-3'  |
| Kshv-miR-K12-4-5p | PCR | Kshv-miR-K12-4 F: 5'-CGCGCAGCTAAACCGCAGTAC-3'  |
| Kshv-miR-K12-5    | PCR | Kshv-miR-K12-5 F: 5'-CGCGCTAGGATGCCTGGAAC-3'   |
| Kshv-miR-K12-6-5p | PCR | Kshv-miR-K12-6 F: 5'-cgcgccCAGCAGCACCTAATC-3'  |
| Kshv-miR-K12-7    | PCR | Kshv-miR-K12-7 F: 5'CGCGCTGATCCCATGTTGCTGGC-3' |
| Kshv-miR-K12-8    | PCR | Kshv-miR-K12-8 F: 5'-CGCGCTAGGCGCGACTGAGAG-3'  |
| Kshv-miR-K12-9    | PCR | Kshv-miR-K12-9 F: 5'-CGCGCACCCAGCTGCGTAAAC-3'  |
| Kshv-miR-K12-10a  | PCR | Kshv-miR-K12-10 F: 5'-CGTGCTAGTGTGTTGCCCCCG-3' |
| Kshv-miR-K12-11   | PCR | Kshv-miR-K12-11 F: 5'-CGCGCTTAATGCTTAGCCTGT-3' |
| Kshv-miR-K12-12   | PCR | Kshv-miR-K12-12 F: 5'-CGCGCACCCAGGCCACCATTC-3' |
| All KSHV miRs     | PCR | Kshv-miR-K12 R: 5'-GTGCAGGGTCCGAGGT-3'         |

---
